# Supplementary material for: High Diversity Revealed in Leaf‐Associated Protists (Rhizaria: Cercozoa) of Brassicaceae
Source: PubMed Central journal article supplement (PMC5031217; doi:10.1111/jeu.12314), 2016-04-14
Supplement: JEU-63-635-s001.pdf [file JEU-63-635-s001.pdf]

## SUPPORTING INFORMATION

### **High Diversity Revealed in Leaf Associated Protists (Rhizaria: Cercozoa) of Brassicaceae** by Sebastian Ploch, Laura Rose, David Bass, Michael Bonkowski

#### Supplemental Material and Methods

Supplemental Table 1 Presence/absence of OTUs for all four species at the two locations, total number of OTUs per species by location combination, and number of unique OTUs are given.

#### **Supplemental Materials and Methods**

*DNA extraction protocol based on Michiels et al. (2003) modified and adjusted for small scale extractions.* The leaf samples were homogenized with metal beads in a 2-ml tube using a shaker mill (MM 200; Retsch GmbH, Germany). 800  $\mu$ l of CTAB-buffer (100 mM Tris, 1.4 M NaCl, 20 mM EDTA, 2% CTAB, 2% Polyvinylpyrrolidone, 0.2% 2-Mercaptoethanol) was added, mixed thoroughly and incubated for 60 min at 60 °C while mixing regularly. 800  $\mu$ l of phenol/chloroform/isoamyl alcohol (25:24:1; Carl Roth, Germany) was added and mixed by inverting the tube. The mixture was centrifuged for 10 min at 8,000 g, and 700  $\mu$ l of the aqueous phase was transferred into a new 2-ml tube. 15  $\mu$ l RNase-A-solution (10 mg ml<sup>-1</sup> RNase A) was added and incubated at 37 °C for 15-30 min. 700  $\mu$ l phenol/chloroform/isoamyl alcohol (25:24:1) was added, mixed by inverting and centrifuged as above. 600  $\mu$ l of the aqueous phase was transferred to a new 2-ml tube, 600  $\mu$ l chloroform/isoamyl alcohol (24:1; Carl Roth, Germany) added, mixed by inverting and centrifuged as above. 500  $\mu$ l of the aqueous phase was transferred to a new 2-ml tube, 1,000  $\mu$ l precipitation-buffer (100% ethanol, 150 mM sodium acetate) added, and incubated in the freezer (-20°C) for at least 1 h. After centrifugation (30 min, 4 °C, 8,000 g) the supernatant was discarded, 500  $\mu$ l ice-cold washing-buffer (70% ethanol) added, and centrifuged for 5 min at 8,000 g. The washing step was repeated once, ethanol carefully removed and the pellet dried. Subsequently, the pellet was dissolved in sterile water.

**Supplemental Table 1** Presence/absence of OTUs for all four species at the two locations, total number of OTUs per species by location combination, and number of unique OTUs are given.

|           | Düsseldorf         |                   |                     |                 | Frankfurt          |                   |                     |                 |
|-----------|--------------------|-------------------|---------------------|-----------------|--------------------|-------------------|---------------------|-----------------|
|           | <i>A. thaliana</i> | <i>C. hirsuta</i> | <i>C. pratensis</i> | <i>D. verna</i> | <i>A. thaliana</i> | <i>C. hirsuta</i> | <i>C. pratensis</i> | <i>D. verna</i> |
| OTU01     | 1                  | 1                 | 1                   | 1               | 1                  | 1                 | 1                   | 1               |
| OTU02     | 1                  | 1                 | 1                   | 0               | 1                  | 1                 | 0                   | 1               |
| OTU03     | 0                  | 1                 | 1                   | 1               | 1                  | 1                 | 0                   | 1               |
| OTU04     | 1                  | 1                 | 1                   | 1               | 1                  | 1                 | 0                   | 0               |
| OTU05     | 0                  | 1                 | 0                   | 0               | 1                  | 1                 | 0                   | 1               |
| OTU06     | 0                  | 1                 | 0                   | 1               | 1                  | 0                 | 1                   | 0               |
| OTU07     | 0                  | 1                 | 1                   | 1               | 0                  | 1                 | 1                   | 0               |
| OTU08     | 0                  | 0                 | 0                   | 1               | 0                  | 1                 | 0                   | 0               |
| OTU09     | 0                  | 1                 | 1                   | 0               | 0                  | 0                 | 1                   | 0               |
| OTU10     | 0                  | 0                 | 0                   | 0               | 1                  | 0                 | 0                   | 0               |
| OTU11     | 0                  | 0                 | 0                   | 1               | 0                  | 0                 | 0                   | 0               |
| OTU12     | 0                  | 1                 | 0                   | 0               | 0                  | 0                 | 0                   | 0               |
| OTU13     | 0                  | 0                 | 0                   | 1               | 0                  | 0                 | 0                   | 0               |
| OTU14     | 1                  | 0                 | 0                   | 0               | 0                  | 0                 | 0                   | 0               |
| OTU15     | 1                  | 0                 | 0                   | 0               | 0                  | 0                 | 0                   | 0               |
| OTU16     | 0                  | 0                 | 1                   | 0               | 0                  | 0                 | 0                   | 0               |
| OTU17     | 0                  | 0                 | 0                   | 0               | 1                  | 0                 | 0                   | 0               |
| OTU18     | 1                  | 0                 | 0                   | 0               | 0                  | 0                 | 0                   | 0               |
| OTU19     | 0                  | 0                 | 0                   | 0               | 1                  | 0                 | 0                   | 0               |
| OTU20     | 1                  | 0                 | 0                   | 0               | 0                  | 0                 | 0                   | 0               |
| OTU21     | 0                  | 0                 | 1                   | 0               | 0                  | 0                 | 0                   | 0               |
| OTU22     | 0                  | 0                 | 0                   | 0               | 0                  | 1                 | 0                   | 0               |
| OTU23     | 0                  | 0                 | 0                   | 0               | 0                  | 0                 | 0                   | 1               |
| OTU24     | 0                  | 0                 | 0                   | 0               | 0                  | 1                 | 0                   | 0               |
| total no. | 7                  | 9                 | 8                   | 8               | 9                  | 9                 | 4                   | 5               |
| unique    | 4                  | 1                 | 2                   | 2               | 3                  | 2                 | 0                   | 1               |
